# Supplementary material for: Copper inducing Aβ42 rather than Aβ40 nanoscale oligomer formation is the key process for Aβ neurotoxicity
Source: Royal Society of Chemistry journal article supplement (doi:10.1039/c1nr11029b), 2011-01-01
Supplement: c1nr11029b.pdf [file c1nr11029b.pdf]

# Electronic Supplementary Information (ESI) for Nanoscale

This journal is (c) The Royal Society of Chemistry 2011

## Copper inducing A $\beta$ 42 rather than A $\beta$ 40 nanoscale oligomer formation is the key process for A $\beta$ neurotoxicity

Lu Jin, Wei-Hui Wu, Qiu-Ye Li, Yu-Fen Zhao and Yan-Mei Li

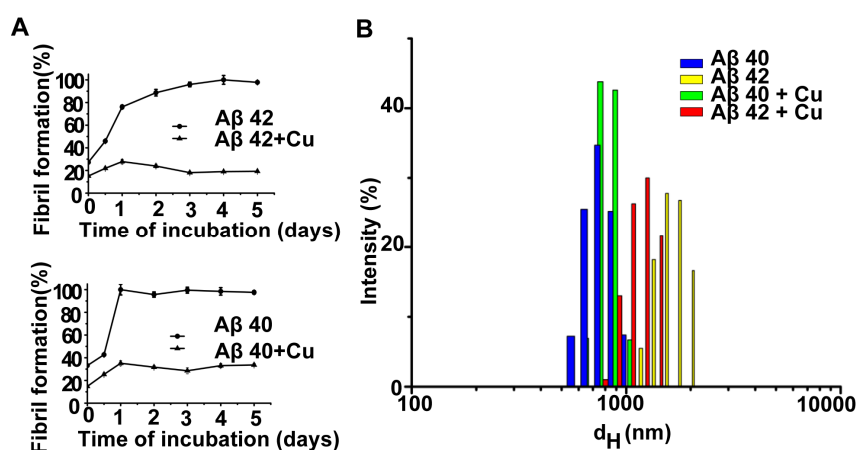

**Fig. S1** Copper modulated the aggregation of A $\beta$ 42 and A $\beta$ 40. (A) Effects of Cu(II) on A $\beta$  fibril formation assessed by the ThT fluorescence assay for 5 days. A $\beta$  was incubated at 10  $\mu$ M alone or with 10  $\mu$ M Cu(II). The data are shown as means $\pm$ SD; n=3. (B) DLS analysis of 10  $\mu$ M A $\beta$ 42 or A $\beta$ 40 incubated alone or with 10 $\mu$ M Cu(II) for 24 hours at 37  $^{\circ}$ C. Different columns show the evolution of the multimodal size distribution peaks.

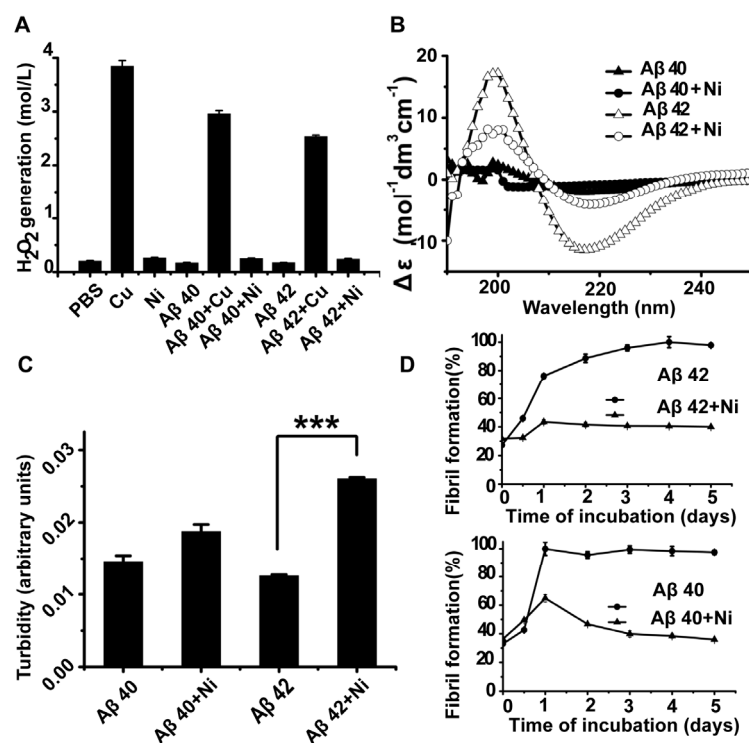

**Fig. S2** Nickel did not produce H<sub>2</sub>O<sub>2</sub>, but recurred copper's effects on Aβ<sub>42</sub> and Aβ<sub>40</sub> conformation and aggregation. (A) The H<sub>2</sub>DCF-DA test for H<sub>2</sub>O<sub>2</sub> generation was performed in solutions of 10 μM Cu(II), Ni(II) or 10 μM Aβ alone, or 10 μM Cu(II) or Ni(II) plus 10 μM Aβ with 5 mM reducing agent dopamine, 100 mM deacetylated H<sub>2</sub>DCF, and 1mM horseradish peroxidase. (B) CD spectra of Ni(II)-induced Aβ<sub>42</sub> and Aβ<sub>40</sub> conformation changes. Curves are against blank and repeated for 5 times. 20 μM Aβ<sub>40</sub> or Aβ<sub>42</sub> was incubated at pH 7.4 at 37 °C for 1 hour with or without 20 μM Ni(II). (C) Turbidity measurements of 10 μM Aβ incubated with or without 10 μM Ni(II) for 3 days. The data are shown as means±SD; n=3. \*\*\*: p < 0.0005 (by two-tailed Student's T-test). (D) Effects of Ni(II) on Aβ fibril formation assessed by the ThT fluorescence assay for 5 days. Aβ was incubated at 10 μM alone or with 10 μM Ni(II). The data are shown as means±SD; n=3. (B) (C) (D) experiments were carried out at the same time with corresponding experiments of copper in Figure 3.
